# 1                   **Whole genomic sequencing as a tool for diagnosis of drug and** 2                   **multidrug-resistance tuberculosis in an endemic region in Mexico**

3 Carlos Francisco Madrazo-Moya<sup>1-2¶</sup>, Irving Cancino-Muñoz<sup>3¶&</sup>, Betzaida Cuevas-  
4 Cordoba<sup>4&</sup>, Vanessa Gonzalez-Covarrubias<sup>4&</sup>, Martín Barbosa-Amezcuca <sup>4&</sup>,  
5 Xavier<sup>5</sup>Soberón <sup>4&</sup>, Raquel Muñoz-Salazar<sup>5¶</sup>, Armando Martínez-Guarneros<sup>6&</sup>, Claudia  
6 Backer<sup>6&</sup>, José Zarrabal-Meza<sup>7&</sup>, Clara Sampieri-Ramirez<sup>1¶</sup>, Antonio Enciso-Moreno<sup>8¶</sup>,  
7 Michael Lauzardo<sup>9&</sup>, Iñaki Comas <sup>3¶&</sup>, Roberto Zenteno-Cuevas<sup>1,2¶,\*</sup>.

8 1. Instituto de Salud Pública, Universidad Veracruzana. Veracruz, México.

9 2. Programa de Maestría en Ciencias de la Salud, Instituto de Ciencias de la Salud.  
10 Universidad Veracruzana, Veracruz, México.

11 3. Biomedicine Institute of Valencia IBV-CSIC, Valencia, Spain; CIBER in Epidemiology  
12 and Public Health, Spain.

13 4. Laboratorio de Farmacogenómica. Instituto Nacional de Medicina Genómica, Ciudad de  
14 México, México

15 5. Laboratorio de Epidemiología y Ecología y Molecular, Escuela de Ciencias de la Salud,  
16 Universidad Autónoma de Baja California, Ensenada, Baja California, México

17 6. Laboratorio de Micobacterias, Instituto Nacional de Diagnóstico y Referencia  
18 Epidemiológica, México.

19 7. Laboratorio Estatal de Salud Pública, Secretaria de Salud, Veracruz, México. Escuela de  
20 Ciencias de la Salud, Universidad Autónoma de Baja California, México.

21 8. Unidad de Investigación Biomédica de Zacatecas, IMSS, Zacatecas, Zacatecas, México

22 9. Division of Infectious Diseases and Global Medicine, College of Medicine, University of  
23 Florida, Gainesville, Florida, USA.

24 ¶ These authors contributed to conceptualization, data analysis and writing, review and  
25 editing of manuscript.

26

1 & These authors contributed to the provision of study materials and methodology.

2 \* Corresponding author: email: [robzencue@gmail.com](mailto:robzencue@gmail.com) (RZ-C)

3 Keywords: Whole Genome Sequencing, *Mycobacterium*, Drug resistance, Mexico

4 Short title: WGS and diagnosis of drug resistance in Mexico

5

## 1 **Abstract**

2 **Background:** Whole genome sequencing (WGS) has been proposed as a tool for  
3 diagnosing drug resistance in tuberculosis. However, reports of its effectiveness in endemic  
4 countries with important numbers of drug resistance are scarce. The goal of this study was  
5 to evaluate the effectiveness of this procedure in isolates from a tuberculosis endemic  
6 region in Mexico.

7 **Methods:** WGS analysis was performed in 81 tuberculosis positive clinical isolates with a  
8 known phenotypic profile of resistance against first-line drugs (isoniazid, rifampin,  
9 ethambutol, pyrazinamide and streptomycin). Mutations related to drug resistance were  
10 identified for each isolate; drug resistant genotypes were predicted and compared with the  
11 phenotypic profile. Genotypes and transmission clusters based on genetic distances were  
12 also characterized.

13 **Findings:** Prediction by WGS analysis of resistance against isoniazid, rifampicin,  
14 ethambutol, pyrazinamide and streptomycin showed sensitivity values of 84%, 96%, 71%,  
15 75% and 29%, while specificity values were 100%, 94%, 90%, 90% and 98%, respectively.  
16 Prediction of multidrug resistance showed a sensitivity of 89% and specificity of 97%.  
17 Moreover, WGS analysis revealed polymorphisms related to second-line drug resistance,  
18 enabling classification of eight and two clinical isolates as pre- and extreme drug-resistant  
19 cases, respectively.

20 Four lineages were identified in the population (L1, L2, L3 and L4). The most frequent of  
21 these was L4, which included 90% (77) of the isolates. Six transmission clusters were

1 identified; the most frequent was TC6, which included 13 isolates with a L4.1.1 and a  
2 predominantly multidrug-resistant condition.

3 **Conclusion:** The results illustrate the utility of WGS for establishing the potential for  
4 prediction of resistance against first and second line drugs in isolates of tuberculosis from  
5 the region. They also demonstrate the feasibility of this procedure for use as a tool to  
6 support the epidemiological surveillance of drug- and multidrug-resistant tuberculosis.

7

## 1 **Introduction**

2           According to the annual report of the World Health Organization in 2017, 10.5  
3 million new cases and 1.7 million deaths were related to tuberculosis (TB), establishing TB  
4 as the infectious disease with the greatest impact on human health. [1]

5           Close to 25% of TB cases recorded worldwide every year show resistance (DR-TB)  
6 to at least one of the four antibiotics used in first line treatment against this disease;  
7 Rifampicin (R), Isoniazid (H), Ethambutol (E) and Pyrazinamide (Z). Of these DR-TB  
8 isolates, about 5% evolve into multi-drug resistant tuberculosis; i.e., they present a  
9 combined resistance to isoniazid and rifampicin (MDR-TB), which may evolve into an  
10 aggravated form known as extreme drug-resistant tuberculosis (TB-XDR), which are  
11 isolates that possess simultaneous resistance to a flouroquinolone and at least one of the  
12 three second-line injectable drugs (amikacin, kanamycin and capreomicin). The number of  
13 isolates with these characteristics is steadily increasing, reducing the possibility of  
14 eliminating TB as a global public health problem by 2020. [2]

15 Whole Genome Sequencing (WGS) provides accurate information about polymorphisms,  
16 insertions and deletions (indels) of potential relevance to the rapid prediction of drug  
17 susceptibility phenotypes of clinical importance [3,4]. The implementation of WGS has  
18 potential for improving traditional phenotypic procedures to detect DR-TB cases and to  
19 influence clinical decision-making in high-income settings [5–11], in addition, this  
20 technique has also been successfully used to examine transmission dynamics, identify  
21 transmission clusters and reconstruct timelines of acquisition of antimicrobial resistance  
22 [12–15].

1 The current body of knowledge regarding mutations that confer drug resistance has led to  
2 the suggestion that identification of true DR-TB isolates may be more complex than  
3 previously thought [16], raising the need to further this type of study in order to identify the  
4 changes involved and increase diagnostic efficiency. Moreover, there is a lack of evidence  
5 regarding the utility of WGS in emerging or poorly-developed countries, which are  
6 precisely those most affected by drug-resistant tuberculosis, and where information relating  
7 to the polymorphism associated with drug resistance is limited [6,17–21]

8 In Mexico, tuberculosis is endemic. According to the 2017 Global Report, 22,869 new  
9 cases of TB were reported in 2016, with an incidence of 22 cases per 100,000 inhabitants  
10 [1]. DR-TB cases were observed in 2.5% of these cases, and there was also a prevalent  
11 population of 610 individuals with MDR-TB. Moreover, increasing numbers of XDR-TB  
12 cases are reported every year [22]. These figures make Mexico the country in the Americas  
13 with the third highest contribution of tuberculosis, including aggravated forms of TB such  
14 as DR-TB, MDR-TB and possibly XDR-TB. [23] Previous studies using Sanger  
15 sequencing protocols have shown that Mexico presents a considerable diversity of  
16 mutations associated with DR-TB, as well as variations related to geographical regions  
17 [24–31], which act to limit the utility of new genotypic diagnostic procedures and make  
18 WGS a very attractive alternative. This study therefore attempts to assess the diagnostic  
19 value of WGS for the detection of resistance to first line anti-tuberculosis drugs in isolates  
20 circulating in a region of Mexico with a high incidence of DR-TB.

## 21 **Materials and Methods**

## 1 **Recovery of mycobacterial strains, culture and drug** 2 **susceptibility test**

3 An initial collection of 91 isolates of mycobacterial strains, with positive drug  
4 resistance determined by the phenotypic test method (BACTEC, MGIT 960 Becton-  
5 Dickinson) from 2012 to 2016, was randomly selected from the strain bank of the Public  
6 Health Institute of Veracruz. Demographic information of the patients bearing the selected  
7 strains was obtained from clinical laboratory records and anonymised.

8 *Mycobacterium tuberculosis* strains were isolated in Lowenstein-Jensen media, and  
9 sensitivity testing against first-line drugs was performed by the fluorometric method  
10 (BACTEC MGIT 960, Becton-Dickinson) using the following critical concentrations:  
11 isoniazid (H) 0.1µg/mL, rifampin (R) 1.0 µg/mL, ethambutol (E) 5.0 µg/mL and  
12 streptomycin (S) 1.0 µg/mL. Pyrazinamide (Z) sensitivity was determined using BACTEC  
13 MGIT 960 PZA kit (Becton Dickinson).

14

## 15 **DNA extraction, WGS sequencing and bioinformatics analysis**

16 Extraction and purification of the genomic DNA from isolates was carried out  
17 following Van Soolingen et al. [32]. Quantification was conducted initially with a nanodrop  
18 (ThermoScientific, USA) with subsequent adjustment to a concentration of 0.2 ng/µL. The  
19 libraries were prepared according to the Nextera XT (Illumina, CA., USA) protocol, using  
20 1ng of DNA quantified by Qubit fluorometer (Invitrogen, CA, USA). Quality was  
21 determined using TapeStation (Agilent Genomics) and the pool was normalized and loaded

1 into a 300-cycle mid output cartridge at 1.8pM. Sequencing was performed using NexSeq  
2 500 (Illumina, CA., USA), in a  $2 \times 150$  paired-end format.

3 Due to the possible presence of DNA material that is not of the *M. tuberculosis* complex,  
4 Kraken software V2 [33] was used to classify the WGS reads and identify other  
5 Mycobacteria species. We further focused only on those reads that belong to the  
6 *Mycobacterium tuberculosis* species. The WGS analysis, including mapping and variant  
7 calling (SNP and INDELS), was performed following a previous pipeline [34]. Briefly,  
8 sequencing reads were mapped and aligned to an inferred MTBC most likely common  
9 ancestor genome using BWA. Variants were then separated into INDELS (small insertions  
10 and deletions included) and single nucleotide polymorphism (SNPs) using VarScan. In  
11 order to detect drug resistance-associated mutations with different frequencies within the  
12 population, single polymorphisms with at least 10 reads in both strands and a quality score  
13 of 20 were classified into two categories. We considered those mutations that involved a  
14 frequency range of 10 and 89% as variant-SNPs, and those with at least 90% frequency in  
15 the sample as constant-SNPs. An INDEL was considered where the mutation was present  
16 with at least 10x depth coverage. Variant annotation was performed using *M. tuberculosis*  
17 H37Rv annotation reference (AL123456.2). In addition, SNPs annotated in regions that  
18 were difficult to map, such as repetitive sequences and PPE/PE-PGRS genes, as well as  
19 those detected near INDELS, were excluded from the analysis.

## 20 Identification of drug resistance-associated variants

21 In order to determine mutations related to drug resistance in the isolates included in  
22 the study, SNP data obtained by WGS were compared to a list of genes known to confer

1 resistance to each anti-tuberculosis drug [35]: For resistance to rifampicin: *rpoB*, *rpoA* and  
2 *rpoC* genes; to streptomycin: *rrs*, *rpsL* and *gidB*; to isoniazid: *katG*, *inhA*, *oxyR-ahpC*, *ndh*,  
3 *fadE24* and *FabG1*; to pyrazinamide: *pncA* and *rpsA*; to ethambutol: *embC*, *embA* and  
4 *embB*. For resistance to second-line drugs; Flouroquinolone: *gyrA* and *gyrB*;  
5 Aminoglycoside: *rrs* and *tlyA*; Ethionamide: *ethR*, *mshA*, *inhA*, *ndh* *ethA* and *fabG*;  
6 Linezolid: *Rrl* and *rplC*; Kanamycin/ethionamide: *eis*; p-amino salicylic acid: *thyA*;  
7 Isoniazid/ethionamide: *inhA*; and finally, for resistance to isoniazide, ethionamide and  
8 amikacin: *ndh*.

## 9 Phylogenetic analysis and identification of transmission clusters

10 In order to classify the isolates, and to identify whether they had a specific genotype  
11 and whether these were related, a phylogenetic analysis was performed. We classified all of  
12 the strains according to the presence of the specific lineages or sub-lineages of phylogenetic  
13 variants proposed by Coll et al. 2014 [36] and Stucki et al. 2016 [37]. In order to detect  
14 highly likely genomic transmission clusters, we performed a pairwise genetic distance  
15 analysis based on a concatenated SNP alignment obtained from every constant-SNP from  
16 every isolate. A  $\leq 12$  SNP threshold was applied to delineate the transmission clusters, as  
17 proposed by Walker et al. 2013 [38]. A phylogeny including all the clinical isolates, with  
18 three samples used as an outgroup (one belonging to Lineage (L) 5, another to L6 and  
19 *Mycobacterium canetti* [34]), was inferred using the maximum likelihood phylogenetic  
20 approach implemented in MEGA V6 [39] by applying a general time reversible model of  
21 nucleotide substitution, with a gamma distribution (GTRGAMMA) and considering 1000  
22 bootstraps. The tree was visualized in iTOL v. 4 (<https://itol.embl.de/tree>).

## 1 Analysis of the diagnostic efficiency of WGS

2 Drug resistant profiles for each first-line drug, as predicted by WGS, were compared  
3 to the BACTEC MGIT phenotypic assay that was used as a reference standard for the  
4 diagnostic. The sensitivity (Sen), specificity (Spe), positive predictive values (PPV) and  
5 negative predictive values (NPV) were determined with 95% confidence intervals. Data  
6 was analyzed using STATA V.13. Inter-test agreement for both results was expressed by  
7 the percentage of overall agreement and kappa ( $\kappa$ ) statistic, according to Landis et al. [40].

## 8 **Ethical concerns**

9 No physical interventions took place with the patients and all of the information  
10 collected was treated as confidential. The ethics committee of the Public Health Institute at  
11 University of Veracruz oversaw and approved the ethical issues involved in this study

12

13

14

## 1 **Results**

### 2 **Isolate recovery, patient data and resistotyping**

3           Ninety-one clinical isolates, obtained from the same number of individuals with TB  
4 and resistance to at least one first-line drug, were initially included in the study. Further  
5 genome analysis confirmed the presence of the species *M. tuberculosis* in 81 of the isolates.  
6 Four isolates presented *M. fortuitum* and two presented *M. abscessus* and it was not  
7 possible to determine the species in a further four isolates. These ten isolates were therefore  
8 excluded from the global study.

9           Of the 81 individuals ultimately included in the study, 50% (42) were male, with a  
10 mean age of 45 years ( $\pm 14.6$ ) and all individuals presented respiratory TB. A total of 36%  
11 (31) presented type 2 diabetes mellitus (T2DM), 47% (40) were undergoing primary  
12 treatment and 42% (36) presented a re-treatment.

13           In relation to the phenotypic drug resistance profile of the 81 isolates determined by  
14 BACTEC MGIT assay, S resistance was observed in 47% (38) of the isolates, while H  
15 resistance was presented in 75% (61), R resistance in 62% (n=51), E resistance in 29% (24)  
16 and Z resistance in 34% (28). A total of 25% (21) of the isolates were classified as mono-  
17 resistant, 14% (12) as poly-resistant, 56% (46) as MDR-TB and 16% (13) as resistant to all  
18 first-line drugs.

### 19 **Polymorphism conferring resistance against first-line drugs**

1 According to the BACTEC MGIT phenotypic assay, 61 isolates showed H  
 2 resistance, of which 51 (62%) presented polymorphisms that could explain their condition,  
 3 while no mutations were detected in ten (12%) of the isolates, according to the WGS  
 4 analysis. The most frequent mutation identified was *katG315S/T* in 35 (60%) isolates,  
 5 followed by the intergenic position 1673425 (c/t) of the *fabG1* gene in nine (14%) isolates  
 6 and the intergenic positions 2726105088-2726145 of *ahpC-OxyR*, which were observed in  
 7 seven (11%) isolates (Table 1).

8 Table 1. Isoniazid mutations obtained by WGS from *Mycobacterium tuberculosis* isolates  
 9 circulating in Veracruz, Mexico

| Position                | Region     | Codon | Amino Acid | Change  | Frequency |
|-------------------------|------------|-------|------------|---------|-----------|
| <b><i>katG</i></b>      |            |       |            |         |           |
| 2154250 <sup>1</sup>    | Coding     | 621   | A → V      | gcc/gtc | 1*        |
| 2155139 <sup>1</sup>    | Coding     | 325   | P → S      | ccg/tcg | 1         |
| 2155167                 | Coding     | 315   | S → R      | agc/aga | 1         |
| 2155168                 | Coding     | 315   | S → T      | agc/acc | 35        |
| 2155168                 | Coding     | 315   | S → I      | agc/atc | 1*        |
| 2155168                 | Coding     | 315   | S → N      | agc/aac | 1         |
| 2155700                 | Coding     | 138   | N → H      | aac/cac | 2*        |
| <b><i>ahpC-OxyR</i></b> |            |       |            |         |           |
| 2726105                 | Intergenic | ---   | ---        | g/a     | 2*        |
| 2726117                 | Intergenic | ---   | ---        | t/a     | 2*        |
| 2726139                 | Intergenic | ---   | ---        | c/t     | 1         |
| 2726145                 | Intergenic | ---   | ---        | g/a     | 2         |
| <b><i>fabG1</i></b>     |            |       |            |         |           |
| 1673425                 | Intergenic | ---   | ---        | c/t     | 9         |
| Total                   |            |       |            |         | 58*       |

10 \* In combination with other mutation in a single isolate.

11

12 Of the 51 isolates that were rifampicin-resistant according to the BACTEC MGIT  
 13 phenotypic assay, 49 (96%) had a mutation in the *rpoB* gene. Some isolates presented more

1 than one mutation, while two isolates presented no mutations. One sensitive isolate, as  
 2 determined by the BACTEC assay, showed the *rpoB430L/P* mutation while another strain  
 3 had the mutation *rpoB432Q/L*. Thirteen mutations were observed, the most frequent of  
 4 which was found at *rpoB450S/L* in 35 (71%) of the isolates (Table 2).

5 Table 2. Rifampicin mutations detected by WGS from isolates of *Mycobacterium*  
 6 *tuberculosis* circulating in Veracruz, Mexico

| Position    | Region | Codon | Amino Acid | Change      | Frequency of mutation |
|-------------|--------|-------|------------|-------------|-----------------------|
| <i>rpoB</i> |        |       |            |             |                       |
| 761004      | Coding | 400   | T → A      | acc/gcc 501 | 1                     |
| 761095      | Coding | 430   | L → P      | ctg/ccg 511 | 1                     |
| 761101      | Coding | 432   | Q → L      | caa/cta 512 | 1                     |
| 761108      | Coding | 434   | M → I      | atg/att 515 | 1                     |
| 761109      | Coding | 435   | D → Y      | gac/tac 516 | 2                     |
| 761110      | Coding | 435   | D → V      | gac/gtc 516 | 3                     |
| 761139      | Coding | 445   | H → Y      | cac/tac 526 | 5                     |
| 761139      | Coding | 445   | H → D      | cac/gac 526 | 1                     |
| 761140      | Coding | 445   | H → L      | cac/ctc 526 | 1                     |
| 761140      | Coding | 445   | H → P      | cac/ccc 526 | 1                     |
| 761140      | Coding | 445   | H → R      | cac/cgc 526 | 1                     |
| 761155      | Coding | 450   | S → L      | tcg/ttg 531 | 35                    |
| 761155      | Coding | 450   | S → W      | tcg/tgg 531 | 2                     |
| Total       |        |       |            |             | 55*                   |

7 \*some isolates with double mutations

8 Of the 24 isolates with phenotypically E resistance, 17 (71%) presented  
 9 polymorphisms that explained their condition, according to WGS. However, seven (30%)  
 10 of the resistant isolates showed no mutation, mine while six isolates, defined as sensitive by  
 11 the BACTEC MGIT phenotypic assay, showed one mutation related to resistance to this  
 12 drug. The most frequent mutation was observed at *embB306M/V/I* in eleven isolates,

1 followed by the *embA* promoter C-12T mutation at the intergenic genome position  
 2 4243221, which was observed in eight isolates (Table 3).

3 Table 3. Ethambutol mutations obtained by WGS from isolates of *Mycobacterium*  
 4 *tuberculosis* circulating in Veracruz, Mexico

| Position           | Region     | Codon | Amino Acid | Change  | Frequency |
|--------------------|------------|-------|------------|---------|-----------|
| <b><i>embA</i></b> |            |       |            |         |           |
| 4243221            | Intergenic | ---   | ---        | c/t     | 8         |
| 4243225            | Intergenic | ---   | ---        | c/a     | 1         |
| <b><i>embB</i></b> |            |       |            |         |           |
| 4246734            | Coding     | 74    | L → R      | ctg/cgg | 1         |
| 4247429            | Coding     | 306   | M → V      | atg/gtg | 2         |
| 4247431            | Coding     | 306   | M → I      | atg/att | 2         |
| 4247431            | Coding     | 306   | M → I      | atg/ata | 7         |
| 4247730            | Coding     | 406   | G → D      | ggc/gac | 2         |
| 4249518            | Coding     | 1002  | H → R      | cac/cgc | 2         |
| Total              |            |       |            |         | 25*       |

5 \*some isolates with double mutations

6 Of the 28 isolates with resistance to Z according to the phenotypic assay, 21 (75%)  
 7 had mutations at *pncA* while seven presented a wild-type genotype. Four isolates  
 8 phenotypically identified as Z-susceptible presented a mutation that could be associated  
 9 with resistance. In total, 17 mutations were identified in *pncA*. The most frequent of these  
 10 was *pncA120L/P*, which was detected in 14 isolates (Table 4).

11

12

13

1 Table 4. Pyrazinamide mutations obtained by WGS from isolates of *Mycobacterium*  
 2 *tuberculosis* circulating in Veracruz, Mexico

| Position    | Region     | Codon | Amino Acid | Change  | Frequency |
|-------------|------------|-------|------------|---------|-----------|
| <i>pncA</i> |            |       |            |         |           |
| 2288766     | Coding     | 159   | L → R      | ctg/cgg | 1         |
| 2288778     | Coding     | 155   | V → G      | gtg/ggg | 1         |
| 2288826     | Coding     | 139   | V → G      | gtg/ggg | 1         |
| 2288836     | Coding     | 136   | D → Y      | gat/tat | 1         |
| 2288839     | Coding     | 135   | T → P      | acc/ccg | 1         |
| 2288841     | Coding     | 134   | A → V      | gcc/gtc | 1         |
| 2288847     | Coding     | 132   | G → A      | ggt/gct | 2         |
| 2288850     | Coding     | 131   | Insertion  | /+cc    | 1         |
| 2288859     | Coding     | 128   | V → G      | gtc/ggc | 1         |
| 2288883     | Coding     | 120   | L → P      | ctg/ccg | 14        |
| 2288988     | Coding     | 97    | G → A      | ggt/gct | 1         |
| 2288988     | Coding     | 85    | L → P      | ctg/ccg | 1         |
| 2289040     | Coding     | 68    | W → G      | tgg/ggg | 1         |
| 2289073     | Coding     | 57    | H → Y      | cac/tac | 1         |
| 2289100     | Coding     | 48    | L → E      | aag/gag | 1         |
| 2289101     | Coding     | 47    | Deletion   | /-gttgc | 1         |
| 2289252     | Intergenic | ---   | ---        | a/g     | 2         |
| Total       |            |       |            |         | 32*       |

3 \*some isolates with double mutations

4 Of the 38 isolates with phenotypic S resistance, only eleven (29%) presented a  
 5 mutation that would explain the resistant condition (Table 5). The remaining 27 (71%)  
 6 isolates presented no change. Only one phenotypically-determined sensitive isolate showed  
 7 one polymorphism associated with resistance. Nine mutations were observed in three genes  
 8 (*gidB*, *rpsL* and *rrs*); the most abundant of which were *rpsL43K/R* and a c/t mutation at  
 9 position 1472362 on the *rrs* gene, both found in three isolates each. (Table 5)

10

- 1 Table 5. Streptomycin mutations obtained by WGS from isolates of *Mycobacterium*  
 2 *tuberculosis* circulating in Veracruz, Mexico

| Position           | Region    | Codon | Amino Acid | Change  | Frequency |
|--------------------|-----------|-------|------------|---------|-----------|
| <b><i>gidB</i></b> |           |       |            |         |           |
| 4407790            | Coding    | 138   | A → V      | gcg/gtg | 1         |
| 4407992            | Coding    | 71    | G → R      | gga/aga | 1         |
| <b><i>rpsL</i></b> |           |       |            |         |           |
| 781687             | Coding    | 43    | K → R      | aag/agg | 3         |
| 781821             | Coding    | 88    | K → Q      | aag/cag | 1         |
| 781822             | Coding    | 88    | K → T      | aag/acg | 1         |
| 781822             | Coding    | 88    | K → R      | aag/agg | 1         |
| <b><i>rrs</i></b>  |           |       |            |         |           |
| 1472359            | Ribosomal | ---   | ---        | a/c     | 1         |
| 1472362            | Ribosomal | ---   | ---        | c/t     | 3         |
| 1472751            | Ribosomal | ---   | ---        | a/g     | 1         |
| Total              |           |       |            |         | 13*       |

3 \*some isolates with double mutations

4

## 5 Polymorphism conferring multidrug and second line drug 6 resistance

7 Of the 46 isolates identified as MDR-TB by the BACTEC MGIT method, 41 (89%)  
 8 showed simultaneous mutations in the genes associated with resistance against rifampicin  
 9 and isoniazid by WGS. Four isolates (7%) lacked any polymorphism associated with  
 10 isoniazid resistance in the *katG*, *inhA*, *oxyR-ahpC* or *FabG1* genes analyzed, and two  
 11 isolates (3%) did not present a mutation associated with rifampicin resistance in *rpoB*, *rpoA*  
 12 and *rpoC* genes.

1           It was not possible to determine phenotypic resistance against second-line drugs in  
2 the isolates analyzed because of limitations in reagents and infrastructure. However, the  
3 WGS analysis of genes related with resistance against these drugs showed that twelve  
4 isolates presented a mutation that would confer resistance to fluoroquinolones; ten had a  
5 mutation at *gyrA*, conferring resistance to ofloxacin, and two had one mutation at *gyrB*,  
6 conferring resistance to levofloxacin (Table 6). In addition, five isolates presented  
7 mutations at *eis* and *rrs*, conferring resistance to kanamycin, amikacin and capreomycin.  
8 Finally, no polymorphisms were observed in genes associated with resistance to linezolid  
9 (*rrl* and *rplC*), aminoglycosides (*tlyA*), ethionamide (*ethR*, *mshA*, *inhA*, *ndh* and *ethA*) and  
10 p-amino salicylic acid (*thyA*).

11           A joint analysis of MDR-TB isolates with the mutations related to resistance against  
12 second-line drugs showed the presence of eight isolates that could potentially be considered  
13 as pre-XDR-TB (with resistance to H and R, associated with resistance to FQ or a second-  
14 line injectable, but not both), as well as three isolates that were recognized as XDR-TB  
15 (with resistance to H and R, and resistance to any of the fluoroquinolones (such as  
16 levofloxacin or moxifloxacin)), and to at least one of the three injectable second-line drugs  
17 (amikacin, capreomycin or kanamycin).

18

19

20

21

1 Table 6. Second line drug mutations determined through WGS from isolates of  
 2 *Mycobacterium tuberculosis* circulating in Veracruz, Mexico.

| Position                                                 | Region     | Codon | Amino Acid | Change  | Frequency |
|----------------------------------------------------------|------------|-------|------------|---------|-----------|
| <b>Fluoroquinolones</b>                                  |            |       |            |         |           |
| <i>gyrB</i>                                              |            |       |            |         |           |
| 6738                                                     | Coding     | 500   | T → N      | acc/aac | 2         |
| <i>gyrA</i>                                              |            |       |            |         |           |
| 7564                                                     | Coding     | 88    | G → A      | ggc/gcc | 1         |
| 7570                                                     | Coding     | 90    | A → V      | gcg/gtg | 3         |
| 7581                                                     | Coding     | 94    | D → Y      | gac/tac | 1         |
| 7582                                                     | Coding     | 94    | D → A      | gac/gcc | 3         |
| 7582                                                     | Coding     | 94    | D → G      | gac/ggc | 2         |
| Total                                                    |            |       |            |         | 12        |
| <b>Kanamycin (KM) / Amikacin (AM) / Capreomicin (CM)</b> |            |       |            |         |           |
| <i>Eis</i>                                               |            |       |            |         |           |
| 2715342                                                  | Intergenic | ---   | ---        | g/a     | 1         |
| <i>Rrs</i>                                               |            |       |            |         |           |
| 1473246                                                  | Ribosomal  | ---   | ---        | a/g     | 4         |
| Total                                                    |            |       |            |         | 10        |

3 \*some isolates with double mutations

#### 4 **Concordance between WGS mutations and phenotypic** 5 **resistance and kappa test**

6 Considering the diagnosis obtained by BACTEC MGIT phenotypic assay as the  
 7 reference test, the efficacy of WGS in terms of predicting resistance against H, R, E, Z and  
 8 S showed sensitivity values of 84%, 96%, 71%, 75% and 29% and specificity values of  
 9 100%, 94%, 90%, 90% and 98%, respectively. The positive predictive values (PPV) were  
 10 100%, 96%, 74%, 84% and 92%, while the negative predictive values (NPV) were 67%,  
 11 94%, 89%, 85% and 62%, respectively. Finally, for multi-drug resistance, sensitivity and  
 12 specificity values of 89% and 97%, and PPV and NPV values of 97% and 88%,  
 13 respectively, were determined.

1           The analysis of concordance with Cohen's kappa test between the phenotypic assay  
2   and the resistance profile determined by WGS showed substantial agreement for H (k: 0.73,  
3   88%), perfect agreement for R(k= 0.90, 95%), substantial agreement for E (k=0.61, 84%)  
4   and Z (k= 0.67, 84%), fair agreement for S (k= 0.28, 66%) and almost perfect agreement  
5   for MDR-TB (k= 0.85, 92%).

## 6   **Phylogenetic analysis and identification of transmission cluster**

7           Four major lineages (L) were observed through the WGS analysis. Two (2.3%)  
8   isolates were included in L1 (EAI), both of which were MDR-TB. Four isolates (5%) were  
9   located within L2 (Beijing) and included three MDR-TB isolates and one potential pre-  
10   XDR-TB isolate. Two isolates (2.3%) were located inside the L3 (CAS), both considered  
11   through the WGS as potentially pre-XDR-TB. The remaining 76 (90%) isolates were  
12   classified within L4, and included eight sub-lineages (T, T1, X2, X3-X1, LAM3, LAM9,  
13   LAM11 and S). The most abundant was sub-lineage 4.1.1 (X), which was present in 23  
14   (28%) isolates, followed by sub-lineage 4.1.2 (H) found in 22 (27%) isolates and sub-  
15   lineage 4.3.3 (LAM) found in eight (10%) isolates (figure 1).

16           The WGS analysis allowed identification of six transmission clusters (TC); TC1  
17   included two isolates with L3, also sharing the polymorphisms related to a pre-XDR-TB  
18   character. The rest of the TC were located within L4; TC2 included three isolates with sub-  
19   lineage 4.3 (LAM), TC3 included three isolates, TC4 had two isolates and TC5 had three  
20   isolates, all included in the sub-lineage 4.1.2 (H). Finally, TC6 included thirteen isolates  
21   with sub-lineage 4.1.1 (X1-X3), all sharing a multidrug resistant condition. One presented

- 1 the polymorphisms that could potentially classify it as pre-XDR-TB and another as XDR-
- 2 TB (Figure 1).
- 3
- 4 Figure 1. Phylogeny and transmission clusters of *M. tuberculosis* isolates from Veracruz,
- 5 Mexico obtained by WGS

## 1 **Discussion**

2 Mexico is a country that presents endemic tuberculosis and more than 20,000 cases  
3 are reported annually, of which close to 1,500 are DR-TB. The state of Veracruz has a  
4 population of close to seven million inhabitants, and contributes 13% (2,500) of the total  
5 number of TB cases in Mexico, close to 15% of the annually reported number of DR-TB  
6 cases in the country and occupies first place in terms of prevalent cases of MDR-TB [22].  
7 For these reasons, Veracruz is positioned as one of the most significant contributors to the  
8 DR-TB and MDR-TB problem in Mexico. The epidemiological characteristics of the  
9 population included in this study, such as a high proportion of individuals with T2DM  
10 (36%) and primary treatment (47%), reflect previous reports for the region [24,25,30,41]  
11 and confirm the influence of T2DM as an important factor in the development of DR-TB  
12 and MDR-TB, as well as highlighting the difficulties for diagnosis, control and preventive  
13 management of DR-TB by the health agencies as well as evidencing the urgent need to  
14 develop new diagnostic procedures.

15 Among the 81 DR-TB isolates subjected to WGS, more than 200 polymorphisms  
16 were identified in 60 positions of the more than 35 genes analyzed. This evidences the  
17 diversity of mutations present in the drug-resistant isolates in circulation, and is in  
18 agreement with previous reports describing mutations identified by Sanger-type sequencing  
19 [27–30,42–44].

20 A sensitivity of 84%, specificity of 100% and kappa concordance of 88% were  
21 determined for the diagnosis of resistance to H; these values are similar to that described in  
22 reports from different locations [8–11,21] (Table. 7). Ten isolates showed no mutations that

1 could explain their phenotypic condition of resistance. The possibility exists that other  
 2 mutations or unreported genes, such as pump flux, may be actively participating but further  
 3 studies are required to confirm this possibility. There was a noteworthy presence of isolated  
 4 carriers of unusual mutations, such as *katGP325S* and *katGN138H* [45], as well as an  
 5 important number of mutations in the intergenic position of *ahpC-OxyR*, described as  
 6 compensatory for isoniazid resistance and associated with *katG* mutations [46].  
 7 Considering all the above, the information obtained supports the proposal of the use of  
 8 WGS as a useful tool for the diagnosis of isoniazid resistance [46] .

9 Table 7. Comparison of percentage of concordance values for drug resistant diagnosis  
 10 prediction obtained by WGS found in this and several other studies

| Drug         | This study Mexico (n=81) |         | Walker et al., 2015 UK (n=701) |         | Coll et al., 2018 Global (n=6465) |         | Shea et al., 2017. New York (n=608) |         | Chatterjee et al., 2017 India (n=74) |         | Cryptic Consortium 2018 (n=10,209) |         |
|--------------|--------------------------|---------|--------------------------------|---------|-----------------------------------|---------|-------------------------------------|---------|--------------------------------------|---------|------------------------------------|---------|
|              | Sen (%)                  | Spe (%) | Sen (%)                        | Spe (%) | Sen (%)                           | Spe (%) | Sen (%)                             | Spe (%) | Sen (%)                              | Spe (%) | Sen (%)                            | Spe (%) |
| Isoniazid    | 84                       | 100     | 85                             | 98      | 90                                | 97      | 87                                  | 99      | 100                                  | 94      | 97                                 | 99      |
| Rifampicin   | 96                       | 94      | 92                             | 99      | 93                                | 98      | 100                                 | 97      | 100                                  | 94      | 97                                 | 99      |
| Ethambutol   | 71                       | 90      | 82                             | 95      | 90                                | 92      | 79                                  | 99      | 100                                  | 78      | 94                                 | 94      |
| Pyrazinamide | 75                       | 90      | 24                             | 100     | 65                                | 92      | 86                                  | 98      | --                                   | --      | 91                                 | 96      |
| Streptomycin | 29                       | 98      | 82                             | 99      | 80                                | 91      | 73                                  | 100     | 85                                   | 100     | --                                 | --      |

11 Sen= sensitivity, Spe=Specificity.

12 The sensitivity of 96% and specificity of 94% observed for the diagnostic of R by  
 13 WGS coincides with previous reports [8–11,21] (Table 7). Two isolates were notable for  
 14 being phenotypically susceptible to rifampicin, despite the fact that they were carriers of the  
 15 mutations *rpoB432Q/L* and *rpoB430L/P* respectively, which have been considered as  
 16 "disputed mutations" [47] that confers low-level R resistance [48]. Isolates carrying this

1 type of mutation are phenotypically misclassified as rifampicin susceptible, and routine  
2 genotypic tests fail in terms of their detection [47]. This indicates that WGS could improve  
3 the local diagnostic of R resistance, and of MDR, considering that rifampicin resistance has  
4 become a subrogated marker of MDR-TB [1]. In this context, the analyses of the 51 R-  
5 resistant isolates included in this study show that 46 (90%) of these were also MDR-TB  
6 according to the BACTEC MGIT phenotypic test, while 41 (80%) presented, through  
7 WGS, the mutations that explain that condition.

8           The sensitivity for the diagnosis of resistance to E by WGS was 71%, which is  
9 one of the lowest described to date [8–11,21] (Table 7). Seven resistant isolates showed no  
10 mutations, while six sensitive isolates showed a mutation associated with resistance to this  
11 drug. These contradictory results can explain the low sensitivity and positive predictive  
12 values observed. Such variations in the occurrence of mutations associated with resistance  
13 to E are similar to those reported previously [49]. Resistant isolates lacking in mutations  
14 and the presence of mutations related to resistance in sensitive isolates show the possibility  
15 of failures in the BACTEC MGIT phenotypic assay, and further analysis is required in  
16 order to identify the factors that cause this low sensitivity and to improve the efficiency of  
17 WGS in predicting resistance against this drug among the isolates from the setting.

18           The sensitivity of 75% observed for Z was low compared to other reports [8–11,21]  
19 (Table 7); however, the specificity of 90% and kappa agreement of 84% supports the use of  
20 WGS for the diagnosis of resistance to this drug. The presence of four susceptible but  
21 mutation-carrying isolates and seven resistant but unmutated (*pncA* or *rpsA*) isolates can  
22 help to explain the low sensitivity found. However, technical problems with *in vitro* testing  
23 of Z resistance associated with inoculum concentration, volume and homogeneity [50], and

1 even changes in the pH of the culture medium, have been considered to influence the  
2 diagnostic of false positive resistant *Z* strains [51]. The diversity and number of mutations  
3 and indels observed in *pncA* was the highest among all of the genes studied, and was  
4 similar to values previously described [29]. A deletion in the *pncA47* position (2289101; -  
5 gttgc) and an insertion in *pncA131* (2288850; +cc) were identified; both indels were  
6 described in isolates circulating in the region five years ago [29], raising the possibility that  
7 these isolates are still actively circulating in the present population.

8 The 29% sensitivity observed for S through the WGS was among the lowest  
9 reported [8–11,21] (Table 7). The mechanisms of resistance to S are complex and involve  
10 several genes. While those considered as canonical (*gibB*, *rpsL* and *rrs*) were characterized  
11 here, only a limited number of isolates carried a mutation; a behavior similar to that  
12 previously observed in isolates from the region [28], highlighting the need for further  
13 studies to identify the mutations involved with resistance against this drug.

14 While S has not been used in Mexico as a first line drug against TB since the 1980s,  
15 the fact that 47% of the isolates analyzed presented resistance to this drug evidences the  
16 possible presence of “old” S resistant strains still in active circulation in the population and  
17 that actually participate in the resistance against first line drugs in TB. This could be of  
18 particular relevance in Mexico, considering the WHO recommendation for use of this drug  
19 as a second line drug in specific situations [52].

20 The sensitivity and specificity for the diagnosis of MDR-TB using WGS were 89%  
21 and 97%, respectively, and presented a kappa agreement of 92%. These values indicate the  
22 feasibility of using this technique as a support for prediction of the diagnosis of these

1 aggravated forms of TB. There is no doubt that this will have a significant value in Mexico,  
2 since it is a country that generates an important number of cases of MDR-TB in Latin  
3 America.

4 Through WGS, eight isolates were identified as bearing the mutations that would  
5 confer a potential pre-XDR-TB character, and three isolates were predicted as XDR-TB;  
6 nevertheless, it was not possible to acquire their phenotypic profiles against second line  
7 drugs and confirm the real condition of these isolates. In this sense, previous reports  
8 describe that it is possible by means of WGS to identify XDR-TB isolates with sensitivity  
9 and specificity values exceeding 85% [6,8,10,18,53]. Thus, the possibility of generating a  
10 faster screening diagnosis of pre- and XDR-TB strains using WGS could have important  
11 implications for a middle-income country such as Mexico, where at least 6 to 12 months are  
12 required to establish a sensitivity profile against second line drugs in isolates suspected of  
13 having this condition.

14 While it was only a relatively small number of isolates studied, four lineages were  
15 identified; 90% (76) were placed in L4 (Euro-American), confirming the predominance of  
16 this lineage in the population [24,25,41,54,55] and the presence of the “founder effect”,  
17 where the predominance of specific lineages seems to limit the dispersion of new or less  
18 frequent lineages [55–57]. Twenty-six (32%) isolates were located within six transmission  
19 clusters, of which two were particularly noteworthy: i) the TC1, which included the only  
20 two isolates with L3 (CAS) and ii) the TC6, comprising 13 (17%) MDR-TB isolates with  
21 sub-lineage 4.1.1 (X), including one isolate identified as pre-XDR-TB and another as XDR-  
22 TB. These CAS and X lineages are rarely referred in Mexico, particularly with such a

1 strong tendency towards drug resistance [24,25,41,54,58] and additional studies will be  
2 necessary to determine the extension of this sub-lineages in the population.

3 The main limitation of this study probably relates to the fact that all of the isolates  
4 came from a single region of Mexico, even though it is one of the states with the highest  
5 number of cases of DR-TB and MDR-TB in the country. It would undoubtedly be  
6 necessary to increase the number of isolates sourced from different regions of the country,  
7 and to identify the mutations that are most frequently involved in the development of  
8 resistance to first- and second-line drugs. This information will guide the application of  
9 WGS, for early diagnosis and treatment of DR-TB, as well as the development of  
10 epidemiological studies to identify the risk factors associated with the development and  
11 transmission of infection generated by DR-TB in the Mexican population.

12 In conclusion, this study illustrates the utility of WGS in terms of the diagnostic of  
13 resistance against first line drugs, MDR-TB and the screening of pre-XDR- and XDR-TB in  
14 Mexico; as well as presenting the valuable additional possibility of characterizing the  
15 genotypes in circulation and identifying transmission clusters, allowing further  
16 development of epidemiological-genomic surveillance studies.

## 17 **Acknowledgments**

18 CFM-M was a CONACYT fellow of the Maestría en Ciencias de la Salud of the  
19 Instituto de Ciencias de la Salud Universidad Veracruzana. RZ-C and IC were partially  
20 funded by I-COOP-2017- COOPB2032. RMS was funded by CONACyT-Problemas  
21 nacionales grant no. 2015-01-147. XS was funded by GACD-FONCICYT Conacyt  
22 No.264693. Thanks go to Nancy Seraphín, from the Division of Infectious Diseases and

1 Global Medicine, University of Florida, Gainesville, Florida, USA, for performing the  
2 WGS of certain isolates.

3

4

## 5 **References**

6

- 7 1. World Health Organization. Global Tuberculosis Report. 2016th ed. World Health  
8 Organizaition; 2017;2017: 1–4. doi:WHO/HTM/TB/2017.23
- 9 2. Stop TB Partnership W. The Global Plan to Stop TB 2016 – 2020. 2016;2020: 1–4.
- 10 3. Feuerriegel S, Schleusener V, Beckert P, Kohl TA, Miotto P, Cirillo DM, et al. PhyResSE:  
11 A web tool delineating Mycobacterium tuberculosis antibiotic resistance and lineage from  
12 whole-genome sequencing data. Carroll KC, editor. J Clin Microbiol. 2015/04/10. 2015;53:  
13 1908–1914. doi:10.1128/JCM.00025-15
- 14 4. Coll F, McNerney R, Preston MD, Guerra-Assunção JA, Warry A, Hill-Cawthorne G, et al.  
15 Rapid determination of anti-tuberculosis drug resistance from whole-genome sequences.  
16 Genome Med. 2015;7: 51. doi:10.1186/s13073-015-0164-0
- 17 5. Witney AA, Gould KA, Arnold A, Coleman D, Delgado R, Dhillon J, et al. Clinical  
18 Application of Whole-Genome Sequencing To Inform Treatment for Multidrug-Resistant  
19 Tuberculosis Cases. Forbes BA, editor. J Clin Microbiol. 2015;53: 1473–1483.  
20 doi:10.1128/JCM.02993-14
- 21 6. Senghore M, Otu J, Witney A, Gehre F, Doughty EL, Kay GL, et al. Whole-genome  
22 sequencing illuminates the evolution and spread of multidrug-resistant tuberculosis in  
23 Southwest Nigeria. PLoS One. 2017/09/20. 2017;12: e0184510.  
24 doi:10.1371/journal.pone.0184510
- 25 7. Witney AA, Cosgrove CA, Arnold A, Hinds J, Stoker NG, Butcher PD. Clinical use of  
26 whole genome sequencing for Mycobacterium tuberculosis. BMC Med. 2016;14: 46.  
27 doi:10.1186/s12916-016-0598-2
- 28 8. Walker TM, Merker M, Kohl TA, Crook DW, Niemann S, Peto TEA. Whole genome  
29 sequencing for M/XDR tuberculosis surveillance and for resistance testing. Clin Microbiol  
30 Infect. Elsevier Ltd; 2017;23: 161–166. doi:10.1016/j.cmi.2016.10.014
- 31 9. Coll F, Phelan J, Hill-Cawthorne GA, Nair MB, Mallard K, Ali S, et al. Genome-wide  
32 analysis of multi- and extensively drug-resistant Mycobacterium tuberculosis. Nat Genet.  
33 2018/01/24. 2018; doi:10.1038/s41588-017-0029-0
- 34 10. Shea J, Halse TA, Lapierre P, Shudt M, Kohlerschmidt D, Van Roey P, et al.  
35 Comprehensive whole-genome sequencing and reporting of drug resistance profiles on  
36 clinical cases of Mycobacterium tuberculosis in New York State. J Clin Microbiol.  
37 2017/04/07. 2017;55: 1871–1882. doi:10.1128/JCM.00298-17
- 38 11. The CRyPTIC Consortium and the 100 000 Genomes Project. Prediction of Susceptibility to  
39 First-Line Tuberculosis Drugs by DNA Sequencing. N Engl J Med. Massachusetts Medical  
40 Society; 2018; NEJMoa1800474. doi:10.1056/NEJMoa1800474
- 41 12. Eldholm V, Monteserin J, Rieux A, Lopez B, Sobkowiak B, Ritacco V, et al. Four decades  
42 of transmission of a multidrug-resistant Mycobacterium tuberculosis outbreak strain. Nat  
43 Commun. Nature Publishing Group; 2015;6: 7119. doi:10.1038/ncomms8119
- 44 13. Eldholm V, Norheim G, von der Lippe B, Kinander W, Dahle UR, Caugant DA, et al.  
45 Evolution of extensively drug-resistant Mycobacterium tuberculosis from a susceptible

- 1 ancestor in a single patient. *Genome Biol. BioMed Central*; 2014;15: 490.  
2 doi:10.1186/s13059-014-0490-3
- 3 14. Cohen KA, Abeel T, Manson McGuire A, Desjardins CA, Munsamy V, Shea TP, et al.  
4 Evolution of Extensively Drug-Resistant Tuberculosis over Four Decades: Whole Genome  
5 Sequencing and Dating Analysis of Mycobacterium tuberculosis Isolates from KwaZulu-  
6 Natal. *PLoS Med.* 2015/09/30. 2015;12: e1001880. doi:10.1371/journal.pmed.1001880
- 7 15. Holt KE, McAdam P, Thai PVK, Thuong NTT, Ha DTM, Lan NN, et al. Frequent  
8 transmission of the Mycobacterium tuberculosis Beijing lineage and positive selection for  
9 the EsxW Beijing variant in Vietnam. *Nat Genet. Nature Publishing Group*; 2018;50: 849–  
10 856. doi:10.1038/s41588-018-0117-9
- 11 16. Zhang Y, Yew WW. Mechanisms of drug resistance in Mycobacterium tuberculosis: Update  
12 2015 [Internet]. *International Journal of Tuberculosis and Lung Disease.* 2015. pp. 1276–  
13 1289. doi:10.5588/ijtld.15.0389
- 14 17. Ali A, Hasan Z, McNerney R, Mallard K, Hill-Cawthorne G, Coll F, et al. Whole genome  
15 sequencing based characterization of extensively drug-resistant mycobacterium tuberculosis  
16 isolates from pakistan. *PLoS One.* 2015/02/27. 2015;10: e0117771.  
17 doi:10.1371/journal.pone.0117771
- 18 18. Aung HL, Tun T, Moradigaravand D, Köser CU, Nyunt WW, Aung ST, et al. Whole-  
19 genome sequencing of multidrug-resistant Mycobacterium tuberculosis isolates from  
20 Myanmar. *J Glob Antimicrob Resist.* 2016/08/18. 2016;6: 113–117.  
21 doi:10.1016/j.jgar.2016.04.008
- 22 19. Manson AL, Abeel T, Galagan JE, Sundaramurthi JC, Salazar A, Gehrmann T, et al.  
23 Mycobacterium tuberculosis Whole Genome Sequences From Southern India Suggest Novel  
24 Resistance Mechanisms and the Need for Region-Specific Diagnostics. *Clin Infect Dis.*  
25 2017/05/13. 2017;64: 1494–1501. doi:10.1093/cid/cix169
- 26 20. Papaventsis D, Casali N, Kontsevaya I, Drobniewski F, Cirillo DM, Nikolayevskyy V.  
27 Whole genome sequencing of Mycobacterium tuberculosis for detection of drug resistance: a  
28 systematic review. *Clin Microbiol Infect.* 2016/10/23. Elsevier Ltd; 2017;23: 61–68.  
29 doi:10.1016/j.cmi.2016.09.008
- 30 21. Chatterjee A, Nilgiriwala K, Saranath D, Rodrigues C, Mistry N. Whole genome sequencing  
31 of clinical strains of Mycobacterium tuberculosis from Mumbai, India: A potential tool for  
32 determining drug-resistance and strain lineage. *Tuberculosis.* 2017/10/21. Elsevier Ltd;  
33 2017;107: 63–72. doi:10.1016/j.tube.2017.08.002
- 34 22. Castellanos-Joya M. Actual situation of Tuberculosis in Mexico, 2014.  
35 <http://www.cenaprece.salud.gob.mx/programas/interior/micobacteriosis/descargas/pdf/SituacionActualTbMexico.pdf> [Internet]. 2014.
- 36 23. Pan American Health Organisation. Tuberculosis in the Americas 2018 [Internet]. PAHO;  
37 2018. doi:10.1086/203554
- 38 24. Flores-Trevino S, Mendoza-Olazarán S, Garza-González E. Drug resistance and molecular  
39 epidemiology of Mycobacterium tuberculosis in Mexico: a systematic review. *Salud Publica*  
40 *Mex.* 2014;56: 63–77. Available: <http://www.ncbi.nlm.nih.gov/pubmed/24912522>
- 41 25. Munro-Rojas D, Fernandez-Morales E, Zarrabal-Meza J, Martínez-Cazares MT, Parissi-  
42 Crivelli A, Fuentes-Domínguez J, et al. Genetic diversity of drug and multidrug-resistant  
43 Mycobacterium tuberculosis circulating in Veracruz, Mexico. *PLoS One.* 2018;13.  
44 doi:10.1371/journal.pone.0193626
- 45 26. Zenteno-Cuevas R, Xochihua-Gonzalez O, Cuevas-Córdoba B, Victoria-Cota NL, Muñoz-  
46 Salazar R, Montero H, et al. Mutations conferring resistance to first- and second-line drugs  
47 in multidrug-resistant Mycobacterium tuberculosis clinical isolates in southeast Mexico  
48 [Internet]. *International Journal of Antimicrobial Agents.* 2015. pp. 671–673.  
49 doi:10.1016/j.ijantimicag.2015.02.006
- 50 27. Zenteno-Cuevas R, Zenteno JC, Cuellar A, Cuevas B, Sampieri CL, Riviera JE, et al.

- 1 Mutations in *rpoB* and *katG* genes in mycobacterium isolates from the Southeast of Mexico.  
2 Mem Inst Oswaldo Cruz. 2009;104: 468–472. doi:10.1590/S0074-02762009000300012
- 3 28. Cuevas-Córdoba B, Cuellar-Sánchez A, Pasissi-Crivelli A, Santana-álvarez CA, Hernández-  
4 Illezcas J, Zenteno-Cuevas R. Rrs and rpsL mutations in streptomycin-resistant isolates of  
5 Mycobacterium tuberculosis from Mexico. J Microbiol Immunol Infect. 2013;46: 30–34.  
6 doi:10.1016/j.jmii.2012.08.020
- 7 29. Cuevas-Córdoba B, Xochihua-González SO, Cuellar A, Fuentes-Domínguez J, Zenteno-  
8 Cuevas R. Characterization of *pncA* gene mutations in pyrazinamide-resistant  
9 Mycobacterium tuberculosis isolates from Mexico. Infect Genet Evol. 2013;19: 330–334.  
10 doi:10.1016/j.meegid.2012.12.013
- 11 30. Juárez-Eusebio DM, Munro-Rojas D, Muñiz-Salazar R, Laniado-Laborín R, Martínez-  
12 Guarneros JA, Flores-López CA, et al. Molecular characterization of multidrug-resistant  
13 Mycobacterium tuberculosis isolates from high prevalence tuberculosis states in Mexico.  
14 Infect Genet Evol. 2016/09/18. 2017;55: 384–391. doi:10.1016/j.meegid.2016.09.012
- 15 31. Pérez-Navarro LM, Fuentes-Domínguez F, Morales-Romero J, Zenteno-Cuevas R. [Factors  
16 associated to pulmonary tuberculosis in patients with diabetes mellitus from Veracruz,  
17 Mexico]. Gac Med Mex. 2011;147: 219–225. Available:  
18 <http://www.ncbi.nlm.nih.gov/pubmed/21743589>
- 19 32. van Soolingen D, Hermans PW, de Haas PE, Soll DR, van Embden JD. Occurrence and  
20 stability of insertion sequences in Mycobacterium tuberculosis complex strains: evaluation  
21 of an insertion sequence-dependent DNA polymorphism as a tool in the epidemiology of  
22 tuberculosis. J Clin Microbiol. 1991;29: 2578–2586. Available:  
23 <http://www.ncbi.nlm.nih.gov/pubmed/1685494>
- 24 33. Wood DE, Salzberg SL. Kraken: ultrafast metagenomic sequence classification using exact  
25 alignments. Genome Biol. 2014;15: R46. doi:10.1186/gb-2014-15-3-r46
- 26 34. Comas I, Coscolla M, Luo T, Borrell S, Holt KE, Kato-Maeda M, et al. Out-of-Africa  
27 migration and Neolithic coexpansion of Mycobacterium tuberculosis with modern humans.  
28 Nat Genet. 2013/09/03. 2013;45: 1176–1182. doi:10.1038/ng.2744
- 29 35. Feuerriegel S, Schleusener V, Beckert P, Kohl TA, Miotto P, Cirillo DM, et al. PhyResSE: a  
30 Web Tool Delineating Mycobacterium tuberculosis Antibiotic Resistance and Lineage from  
31 Whole-Genome Sequencing Data. J Clin Microbiol. 2015/04/10. 2015;53: 1908–1914.  
32 doi:10.1128/JCM.00025-15
- 33 36. Coll F, McNerney R, Guerra-Assunção JA, Glynn JR, Perdigão J, Viveiros M, et al. A  
34 robust SNP barcode for typing Mycobacterium tuberculosis complex strains. Nat Commun.  
35 2014/09/02. 2014;5: 4–8. doi:10.1038/ncomms5812
- 36 37. Stucki D, Ballif M, Egger M, Furrer H, Altpeter E, Battegay M, et al. Standard Genotyping  
37 Overestimates Transmission of Mycobacterium tuberculosis among Immigrants in a Low-  
38 Incidence Country. J Clin Microbiol. 2016/05/20. 2016;54: 1862–1870.  
39 doi:10.1128/JCM.00126-16
- 40 38. Walker TM, Ip CL, Harrell RH, Evans JT, Kapatai G, Dedicoat MJ, et al. Whole-genome  
41 sequencing to delineate Mycobacterium tuberculosis outbreaks: a retrospective observational  
42 study. Lancet Infect Dis. 2012/11/20. 2013;13: 137–146. doi:10.1016/S1473-  
43 3099(12)70277-3
- 44 39. Tamura K, Stecher G, Peterson D, Filipski A, Kumar S. MEGA6: Molecular Evolutionary  
45 Genetics Analysis Version 6.0. Mol Biol Evol. 2013;30: 2725–2729.  
46 doi:10.1093/molbev/mst197
- 47 40. Landis JR, Koch GG. The measurement of observer agreement for categorical data.  
48 Biometrics. 1977;33: 159–74. Available: <http://www.ncbi.nlm.nih.gov/pubmed/843571>
- 49 41. Martínez-Guarneros A, Rastogi N, Couvin D, Escobar-Gutierrez A, Rossi LM, Vazquez-  
50 Chacon CA, et al. Genetic diversity among multidrug-resistant Mycobacterium tuberculosis  
51 strains in Mexico. Infect Genet Evol. 2013;14: 434–443. doi:10.1016/j.meegid.2012.12.024

- 1 42. Zenteno-Cuevas R, Montes-Villaseñor E, Morales-Romero J, Coronel-Martín del Campo G,  
2 Cuevas B. Co-infection and risk factors of tuberculosis in a Mexican HIV+ population. *Rev*  
3 *Soc Bras Med Trop.* 2011;44: 282–285. doi:10.1590/S0037-86822011005000034
- 4 43. Cuevas-Córdoba B, Juárez-Eusebio DM, Almaraz-Velasco R, Muñoz-Salazar R, Laniado-  
5 Laborin R, Zenteno-Cuevas R, et al. Mutation at embB codon 306, a potential marker for the  
6 identification of multidrug resistance associated with ethambutol in *Mycobacterium*  
7 *tuberculosis.* *Antimicrob Agents Chemother.* 2015;59: 5455–5462.  
8 doi:10.1128/AAC.00117-15
- 9 44. Zenteno-Cuevas R, Cuevas-Cordoba B, Enciso A, Enciso L, Cuellar A. Assessing the utility  
10 of three TaqMan probes for the diagnosis of tuberculosis and resistance to rifampin and  
11 isoniazid in Veracruz, México. *Can J Microbiol.* 2012;58: 318–325. doi:10.1139/w11-127
- 12 45. Seifert M, Catanzaro D, Catanzaro A, Rodwell TC. Genetic mutations associated with  
13 isoniazid resistance in *Mycobacterium tuberculosis*: a systematic review. *PLoS One. Public*  
14 *Library of Science;* 2015;10: e0119628. doi:10.1371/journal.pone.0119628
- 15 46. Sherman DR, Mdluli K, Hickey MJ, Arain TM, Morris SL, Barry CE, et al. Compensatory  
16 *ahpC* gene expression in isoniazid-resistant *Mycobacterium tuberculosis.* *Science.* 1996;272:  
17 1641–3. Available: <http://www.ncbi.nlm.nih.gov/pubmed/8658136>
- 18 47. Van Deun A, Aung KJM, Bola V, Lebeke R, Hossain MA, de Rijk WB, et al. Rifampin drug  
19 resistance tests for tuberculosis: challenging the gold standard. *J Clin Microbiol. American*  
20 *Society for Microbiology (ASM);* 2013;51: 2633–40. doi:10.1128/JCM.00553-13
- 21 48. Miotto P, Cabibbe AM, Borroni E, Degano M, Cirillo DM. Role of Disputed Mutations in  
22 the *rpoB* Gene in Interpretation of Automated Liquid MGIT Culture Results for Rifampin  
23 Susceptibility Testing of *Mycobacterium tuberculosis.* *J Clin Microbiol. American Society*  
24 *for Microbiology Journals;* 2018;56: e01599-17. doi:10.1128/JCM.01599-17
- 25 49. Cuevas-Córdoba B, Juárez-Eusebio DM, Almaraz-Velasco R, Muñoz-Salazar R, Laniado-  
26 Laborin R, Zenteno-Cuevas R. Mutation at embB codon 306, a potential marker for the  
27 identification of multidrug resistance associated with ethambutol in *Mycobacterium*  
28 *tuberculosis.* *Antimicrob Agents Chemother.* 2015;59: 5455–5462.  
29 doi:10.1128/AAC.00117-15
- 30 50. Chedore P, Bertucci L, Wolfe J, Sharma M, Jamieson F. Potential for Erroneous Results  
31 Indicating Resistance When Using the Bactec MGIT 960 System for Testing Susceptibility  
32 of *Mycobacterium tuberculosis* to Pyrazinamide. *J Clin Microbiol.* 2010;48: 300–301.  
33 doi:10.1128/JCM.01775-09
- 34 51. Piersimoni C, Mustazzolu A, Giannoni F, Bornigia S, Gherardi G, Fattorini L. Prevention of  
35 false resistance results obtained in testing the susceptibility of *Mycobacterium tuberculosis*  
36 to pyrazinamide with the Bactec MGIT 960 system using a reduced inoculum. *J Clin*  
37 *Microbiol.* 2013;51: 291–4. doi:10.1128/JCM.01838-12
- 38 52. WHO | Companion handbook to the WHO guidelines for the programmatic management of  
39 drug-resistant tuberculosis. WHO. World Health Organization; 2016;
- 40 53. Mahomed S, Naidoo K, Dookie N, Padayatchi N. Whole genome sequencing for the  
41 management of drug-resistant TB in low income high TB burden settings: Challenges and  
42 implications. *Tuberculosis.* 2017/10/21. Elsevier Ltd; 2017;107: 137–143.  
43 doi:10.1016/j.tube.2017.09.005
- 44 54. Zenteno-Cuevas R, Mendoza-Damián F, Muñoz ICIC, Enciso-Moreno L, Pérez-Navarro  
45 LMLM, Ramírez-Hernández MDMD, et al. Description of the population structure and  
46 genetic diversity of tuberculosis in Estado de México, a low prevalence setting from Mexico.  
47 *APMIS.* 2015;123: 116–122. doi:10.1111/apm.12312
- 48 55. Munro-Rojas D, Fernandez-Morales E, Zarrabal-Meza J, Martínez-Cazares MTMT, Parissi-  
49 Crivelli A, Fuentes-Domínguez J, et al. Genetic diversity of drug and multidrug-resistant  
50 *Mycobacterium tuberculosis* circulating in Veracruz, Mexico. Mokrousov I, editor. *PLoS*  
51 *One. Public Library of Science;* 2018;13: e0193626. doi:10.1371/journal.pone.0193626

- 1 56. Grandjean L, Iwamoto T, Lithgow A, Gilman RH, Arikawa K, Nakanishi N, et al. The  
2 Association between Mycobacterium Tuberculosis Genotype and Drug Resistance in Peru.  
3 PLoS One. 2015/05/20. 2015;10: e0126271. doi:10.1371/journal.pone.0126271
- 4 57. Dymova MA, Liashenko OO, Poteiko PI, Krutko VS, Khrapov EA, Filipenko ML. Genetic  
5 variation of Mycobacterium tuberculosis circulating in Kharkiv Oblast, Ukraine. BMC  
6 Infect Dis. BioMed Central; 2011;11: 77. doi:10.1186/1471-2334-11-77
- 7 58. Flores-López CA, Zenteno-Cuevas R, Laniado-Laborín R, Reynaud Y, García-Ortiz RA,  
8 González-Y-Merchand JA, et al. Molecular epidemiology of Mycobacterium tuberculosis in  
9 Baja California, Mexico: A result of human migration? Infect Genet Evol. 2017;55: 378–  
10 383. doi:10.1016/j.meegid.2016.07.001
- 11



figure 1
